# Supplementary material for: Identification of genes for engineering the male germline of Aedes aegypti and Ceratitis capitata
Source: PubMed Central journal article supplement (PMC5117610; doi:10.1186/s12864-016-3280-3), 2016-11-21
Supplement: 12864_2016_3280_MOESM4_ESM.pdf [file 12864_2016_3280_MOESM4_ESM.pdf]

## **Primers for expression candidates**

### **RT-PCR primers**

#### *Ae. aegypti*

|                      |                       |
|----------------------|-----------------------|
| Novel gene 1 forward | ACCGAAGCTACAAGGACGC   |
| Novel gene 1 reverse | CAGCAGCCGACCCGGAA     |
| AAEL000463 forward   | GGCCGTTTTGGCACATTCTT  |
| AAEL000463 reverse   | CACGCGTTTTTCACTTTGCG  |
| AAEL001333 forward   | CGAGACCGTTCTCCTCAACC  |
| AAEL001333 reverse   | TCCTCGCACATTTTTCTCCG  |
| AAEL003021 forward   | GGCCGTTTTGGCACATTCTT  |
| AAEL003021 reverse   | CACGCGTTTTTCACTTTGCG  |
| AAEL004293 forward   | GCGAGAAAAGAAGCGTAAAC  |
| AAEL004293 reverse   | TCCTCAGTTGACTCACGTCG  |
| AAEL006665 forward   | TCAAAGCCCTCAAGAATCGGA |
| AAEL006665 reverse   | TCATTGCTTGTGCACTCACC  |
| AAEL009267 forward   | GTGAAGACGACCTTGCTCCA  |
| AAEL009267 reverse   | CCATGTGACGTTCTTTGCG   |
| AAEL010268 forward   | CCTGCACCGATCGAAGTCAA  |
| AAEL010268 reverse   | TGGTGGTGGCAGATGAAACA  |
| AAEL011838 forward   | GGCAATCGGTTGTACCTGGA  |
| AAEL011838 reverse   | ATCACATCGCCAGGCTTGAA  |
| AAEL012065 forward   | CGCGAATACCATAAGCCCCT  |
| AAEL012065 reverse   | CGCAGCTACCACTACTACCG  |
| AAEL012239 forward   | GGTGCTAGTGGTGGAAACGAA |
| AAEL012239 reverse   | TCTTTGGCTTCACGCTTTGC  |
| RpL22 forward        | AAACAACCTCCTGCGAGGCAA |
| RpL22 reverse        | CACGCAGGCTGTTCTTCTTC  |

#### *C. capitata*

|                      |                        |
|----------------------|------------------------|
| LOC101449084 forward | TACTGAGACAACAGCGCCAG   |
| LOC101449084 reverse | TCGAACGCTCCGATACCAAG   |
| LOC101449780 forward | TTGCCGAAACTTGCCCAAAG   |
| LOC101449780 reverse | CACTCAACCGGATCACCCAA   |
| LOC101451111 forward | CAATTTATGGGCCTCTTTTCGG |
| LOC101451111 reverse | CGATTCCGCAACGTAAGCAG   |
| LOC101451785 forward | AGCGTTGGGTTGTGTGATGA   |
| LOC101451785 reverse | GACAATCCCGATGGAGCAGT   |
| LOC101454909 forward | TGCTCATGTTGCTGTTGTGC   |
| LOC101454909 reverse | GCCGATGATGTAGATGCCGA   |
| LOC101455161 forward | GCGGAAGTACTCGGCTATTG   |
| LOC101455161 reverse | CCCGTTGGTAGGACATGCT    |
| LOC101457895 forward | CTACAGCGAGCTACGTCCAT   |
| LOC101457895 reverse | CCGGACCCTCTGCTTTTCATT  |
| LOC101459316 forward | GAAAATCGCAAAGCTGCCCA   |
| LOC101459316 reverse | TGATGCTTGCTGGCATCTCA   |
| LOC101459689 forward | CCCACACTGATCGGCTACTC   |
| LOC101459689 reverse | ATGTAGCCTGCAGCAAAGGT   |
| LOC101462854 forward | GTAGTCGTA CTACCGAGCC   |
| LOC101462854 reverse | CGCGCAGTGATTATCTCGTT   |
| RpL22 forward        | CAACACGGATCCAATCACGC   |
| RpL22 reverse        | TGCTGCTGCATCTGCTACTT   |

## **qRT-PCR primers**

### *Ae. aegypti*

|                           |                        |
|---------------------------|------------------------|
| AAEL001333 forward        | CGTACTCCACGGAGGTCATC   |
| AAEL001333 reverse        | GTCCTCGCACATTTTTCTCCG  |
| AAEL003021 forward        | GGAGCTGCATGAGAGGTGTT   |
| AAEL003021 reverse        | CATGCTGACCAGGACCATGA   |
| AAEL006665 forward        | TCAAAGCCCTCAAGAATCGGA  |
| AAEL006665 reverse        | TCGTTTGATGGCGTACAGGG   |
| AAEL009267 forward        | TGAGATTAAGTTCCACGACGAC |
| AAEL009267 reverse        | CCGTTTCAGTGCGACTTGTG   |
| AAEL010268 forward        | GCTTTGACAGTGAAACTGTGGC |
| AAEL010268 reverse        | CGCAAATCAGTGAAGCTTGGA  |
| AAEL012065 forward        | CGCGAATACCATAAGCCCCT   |
| AAEL012065 reverse        | TGGTGGTACGTAACCCGTTG   |
| AAEL012239 forward        | GCCAACGGAGATCTAGAAGTT  |
| AAEL012239 reverse        | CGCTTTGCCTTGACATGAGC   |
| $\alpha$ -tubulin forward | TCGGACAAAACCATCGGAGG   |
| $\alpha$ -tubulin reverse | ACGGTTGGTTCCAGATCGAC   |

### *C. capitata*

|                           |                        |
|---------------------------|------------------------|
| LOC101449084 forward      | TGTTGAGAGCATCACGATCAC  |
| LOC101449084 reverse      | TGCCTCATCGTCGGAATGTT   |
| LOC101449780 forward      | TTGAAGCTCCCCGATGTTGC   |
| LOC101449780 reverse      | TGACCAATAGCACCCTGGC    |
| LOC101451111 forward      | CCCAAAGCAGCAGGTAGACA   |
| LOC101451111 reverse      | GCATTCACGTCCAATGTCGC   |
| LOC101451785 forward      | GACCGTTATGTGCGTCATGC   |
| LOC101451785 reverse      | GCCAACGGTGTTCTTCAACG   |
| LOC101457895 forward      | TCTGAAACGTACCCAGAAGGC  |
| LOC101457895 reverse      | CCCGGTCATATCTGTCAGCC   |
| LOC101459316 forward      | CGCTCCATAAGCGTCGTATCT  |
| LOC101459316 reverse      | CCCAAACCGATGGTTGAGAA   |
| LOC101459689 forward      | AAACGCAAAGCCACCTTGAC   |
| LOC101459689 reverse      | TGGGTTGGTGCCACGAATTA   |
| LOC101462854 forward      | CCATTGTTAAACGAGGCAACGA |
| LOC101462854 reverse      | TGGCACCATTATACCCTGCG   |
| $\alpha$ -tubulin forward | TGCCCTACCCACGTATTCAC   |
| $\alpha$ -tubulin reverse | ACCATCTGGTTGGCTGGTTC   |

## Primers for splicing candidates

### RT-PCR primers

Primers for amplifying both predicted testis-specific and other splice forms

#### *Ae. aegypti*

|                             |                         |
|-----------------------------|-------------------------|
| AAEL001916 forward          | GGCCGGGCTCTTAATGTGAT    |
| AAEL001916 reverse          | GCAACGACAATGGCTGGCAA    |
| AAEL005651 forward          | CGTAGTTCGCTTCGTGGAGT    |
| AAEL005651 reverse          | ACTAAGCACCGGTTTCTCCG    |
| AAEL005935 forward          | CGGGGTCCTTTTACACCGAA    |
| AAEL005935 reverse          | GAGAATCAAGTGGTCGAGCG    |
| AAEL007258 forward          | CCCGTCGCCTATTTACCAA     |
| AAEL007258 reverse          | GTTTGGGGATAACGTATCGC    |
| AAEL008110 intron 2 forward | CAAATGCATGATGCGTTCCT    |
| AAEL008110 intron 2 reverse | GCTGCAAGCGTTGGATATGG    |
| AAEL008428 forward          | GGGACTTTGACTCGCACAGA    |
| AAEL008428 reverse          | AGCAGCAATTCGGTTTTGCAT   |
| AAEL010509 forward          | TAAATCGCCGCCATCACCAT    |
| AAEL010509 reverse          | GATTTAGAGCGGCCGAGTGA    |
| AAEL011105 forward          | TCCGAGTGGTCGCCATTTTG    |
| AAEL011105 reverse          | TCACGTTGTCCTCATGGGTG    |
| AAEL011968 forward          | TCCAAGTGTTCAGCTCGTCG    |
| AAEL011968 reverse          | TGGCACAGTAAGCCTGTTGA    |
| AAEL012262 forward          | CAGTGCCAGCAAAGCAGAAG    |
| AAEL012262 reverse          | TACAACCGAGCGTCATTGCT    |
| AAEL013571 forward          | GTCGAGAAGGTAAGTCTCGAGCG |
| AAEL013571 reverse          | GACGTCGAAGCAACTGGGTT    |
| AAEL014957 forward          | TGCACGAAAAGGAGCAACG     |
| AAEL014957 reverse          | AGTTTGTGTAGCGGTGCGTT    |
| AAEL017395 forward          | TGATTCGTCCGTTGGCTGTT    |
| AAEL017395 reverse          | CACCACTCGTCTGTGTCTCG    |
| AAEL018039 forward          | TCAGCAGCAACCGTTCTACC    |
| AAEL018039 reverse          | CCGCGTTGAGTCAGGAACAT    |
| AAEL018211 intron 1 forward | CCATCTTTCGACGCGTGTTT    |
| AAEL018211 intron 1 reverse | TCCAAGTCCGCAAGACAAGG    |
| AAEL018350 forward          | ATGGTGGCCCAAACCAATG     |
| AAEL018350 reverse          | TTGTTTGTGATGCGGGACTG    |

#### *C. capitata*

|                               |                          |
|-------------------------------|--------------------------|
| LOC101449503 forward          | CCGCCCTTTAGGTGTATGGG     |
| LOC101449503 reverse          | TGTTTTCGTATTGATTTTCCCTGG |
| LOC101450565 forward          | AACGGGGTTTGGCAACTGTA     |
| LOC101450565 reverse          | GAAGGATCGCGTTGAGACCA     |
| LOC101453609 forward          | TGAGGAGGGACACAGGTCAA     |
| LOC101453609 reverse          | TGCAGCTTCCGATGTCTGTT     |
| LOC101457260 forward          | CTCACCACCGGGTGATATGG     |
| LOC101457260 reverse          | ACCGCGAGATCCGAAAATGT     |
| LOC101459514 intron 1 forward | GGAGAAGCAACTGGGGTGTT     |
| LOC101459514 intron 1 reverse | TAGGGCAAACACTGACCCG      |
| LOC101459514 intron 2 forward | TGGCGATCCTGCTCACCAGAA    |
| LOC101459514 intron 2 reverse | TAGGGCAAACACTGACCCG      |

Primers for amplifying predicted testis-specific splice form

*Ae. aegypti*

|                             |                           |
|-----------------------------|---------------------------|
| AAEL000028 forward          | TTTGGTTGTCCAGGTCCCAC      |
| AAEL000028 reverse          | CGTTTTAGTTGGAAAATTGTTTGCT |
| AAEL001898 forward          | TGGGCTAAAAAGAGAGGCAA      |
| AAEL001898 reverse          | CCCAGTACATTTAAAAAGCATGAAG |
| AAEL002083 forward          | CAGATTCGTCCTGATCGCCA      |
| AAEL002083 reverse          | ATGCTAACAAGCGCTGTCCA      |
| AAEL008110 intron 1 forward | GGCAATCAAACCCTTGATTCTGT   |
| AAEL008110 intron 1 reverse | AATGCAAGTTTCGTCCGTGC      |
| AAEL008110 intron 2 forward | CTTGCTCATTTGCTCAGCATC     |
| AAEL008110 intron 2 reverse | GCTGCAAGCGTTGGATATGG      |
| AAEL008428 forward          | GGGACTTTGACTCGCACAGA      |
| AAEL008428 reverse          | CGGTTTTGCATGTCTTCATAAGC   |
| AAEL011153 forward          | TCTGCCTTGCCAGTGATTGA      |
| AAEL011153 reverse          | TGCTCGGCTTTGAAGAACCC      |
| AAEL012262 forward          | AAACAGCCATCAAGCAATGTG     |
| AAEL012262 reverse          | CGCTACGCAATGAAGGGAGA      |
| AAEL013571 forward          | TCATCCTGGTAATTGTCACTCAA   |
| AAEL013571 reverse          | GGGTTTAATAGACGATGGAAACGG  |
| AAEL018211 intron 1 forward | CCTTCACGCAATGTCTGGA       |
| AAEL018211 intron 1 reverse | CGGTCCAGTTCCTAATTGAA      |
| AAEL018211 intron 2 forward | CCTTCACGCAATGTCTGGA       |
| AAEL018211 intron 2 reverse | TTGTCAAAGACTGGCTAGAGTGA   |
| AAEL018350 forward          | ACTCAAAGAAATTAGTAATAAGGA  |
| AAEL018350 reverse          | CACTTTCTTTGCTTGTTCCC      |

*C. capitata*

|                               |                           |
|-------------------------------|---------------------------|
| LOC101448609 forward          | TACTATTGACTACGGGTGAAGC    |
| LOC101448609 reverse          | TCGAAAATGCGTCGCTGTTG      |
| LOC101449153 intron 1 forward | GCTTCGCCTGCAGGTAGTC       |
| LOC101449153 intron 1 reverse | CATGGGTTTGGCATGTGACG      |
| LOC101449153 intron 2 forward | TCAATGTTAGCTCAATATTTGCCAT |
| LOC101449153 intron 2 reverse | GACTGAAACGAAGGCGCAAG      |
| LOC101449153 intron 3 forward | AATTGTGATTGCATTTTGCTCA    |
| LOC101449153 intron 3 reverse | CTCGAGGGCATGGTTACACA      |
| LOC101449503 forward          | TGCCAATGTCCATGTAGCAC      |
| LOC101449503 reverse          | TTTATTCGAGTGGTACGTCAGC    |
| LOC101450641 forward          | TGGTAGGTAGTTAAGTTATTTGACA |
| LOC101450641 reverse          | AGGCTTTTGAAGCTTTTCTCA     |
| LOC101452861 forward          | TTCTGGTGGCATAACAGGTCG     |
| LOC101452861 reverse          | CGTACTGTGCAACTGGAGGT      |
| LOC101452984 forward          | ACTTAATAATCACACAATGGCCGA  |
| LOC101452984 reverse          | TCTCATCCAATTCGGCAGGC      |
| LOC101457260 forward          | TCAGTATCGGCGGCATCAGT      |
| LOC101457260 reverse          | TGGAAACCATCGTCTCTATGCT    |
| LOC101459514 intron 1 forward | GCCAAGAGTCGTTGTGGTGT      |
| LOC101459514 intron 1 reverse | TCGCTTTGTTTTATCCGTCAATTA  |
| LOC101459514 intron 2 forward | AATTGGCGATCCTGCTCAC       |
| LOC101459514 intron 2 reverse | TTTAGAGGTAGACCAGTTATTTCAA |
| LOC101461218 forward          | AACAACCTTCGAAAACCTGTAAGCG |
| LOC101461218 reverse          | CTAAGCGAATCCTCGGGTCC      |

Primers for amplifying other splice forms

*Ae. aegypti*

|                      |                           |
|----------------------|---------------------------|
| AAEL000028 forward   | TTTGGTTGTCCAGGTCCCAC      |
| AAEL000028 reverse A | TGTCATTATTTACAAGGTTTGCTGT |
| AAEL000028 reverse B | TACTTCCGAGAATGCGAGCC      |
| AAEL001898 forward   | GACTGGATGCCACTGTCCTG      |
| AAEL001898 reverse   | CTAGAGCGTATCCTGCCAGC      |
| AAEL002083 forward A | CAGATTCGTCCTGATCGCCA      |
| AAEL002083 forward B | GTTTTCCCACGTAGCTTCCG      |
| AAEL002083 reverse   | TGGCGTTGTCCATGTCTGTT      |
| AAEL008110 forward   | AAGGTCTTTCAGCCTCTGGC      |
| AAEL008110 reverse   | ACGAATGCGCCGAAATGAAG      |
| AAEL008428 forward   | TGCCTTGTCAAGAAAATCCCA     |
| AAEL008428 reverse   | TCGTTATCGCTGAGGCATCC      |
| AAEL011153 forward   | TCTGCCTTGCCAGTGATTGA      |
| AAEL011153 reverse   | CTTGAAAAGAACCCTCACGC      |
| AAEL018211 forward   | CCATCTTTCGACGCGTGTTCC     |
| AAEL018211 reverse   | TTCAAAGCGCACGTTGATCC      |
| AAEL018350 forward   | ACAAGCTGCTCCAACCTCCTC     |
| AAEL018350 reverse   | TCGGACGGTGATGGTTTTCC      |

*C. capitata*

|                        |                          |
|------------------------|--------------------------|
| LOC101448609 forward   | TAGGCCATGCACAAGTTGGT     |
| LOC101448609 reverse   | TCGAAAATGCGTCGCTGTTG     |
| LOC101449153 forward   | TTTGCTCACTCTTCTCGCGT     |
| LOC101449153 reverse   | CTCGAGGGCATGGTTACACA     |
| LOC101450641 forward   | CAAGCCTTTCGCCTTCGTTC     |
| LOC101450641 reverse   | TGCCAACTCGGTGTTGTCTG     |
| LOC101452861 forward   | CTGTTGCTGTTGGAGAAGGGT    |
| LOC101452861 reverse   | TCTGCCATCACATCAGCAGTT    |
| LOC101452984 forward A | GGCAGTAAACAATCGACGAC     |
| LOC101452984 forward B | CCGAACTCGTTGCTTTCCG      |
| LOC101452984 reverse   | GCGAAATCATTGGGACCCTC     |
| LOC101457260 forward   | CTGTAGACGCACGGTTTCCA     |
| LOC101457260 reverse   | AACGTGTCGTAGATGAGGACG    |
| LOC101459514 forward   | ATGATGTTACCAAATGGCCAAATA |
| LOC101459514 reverse   | CATTGCACCGATTTATTGGTTTC  |
| LOC101461218 forward   | TCGCCTGTACATTCTTGCGT     |
| LOC101461218 reverse   | CATCCGATAAAACGCCAGCC     |

## qRT-PCR primers

Primers for amplifying predicted testis-specific splice form

### *Ae. aegypti*

|                             |                           |
|-----------------------------|---------------------------|
| AAEL000028 forward          | CAGTTGGGAGGCTTCGGTAG      |
| AAEL000028 reverse          | CCGTTTTAGTTGGAAAATTGTTTGC |
| AAEL001898 forward          | TTCAGTGTGCTTTGGAGGTGT     |
| AAEL001898 reverse          | CCCAGTACATTTAAAAAGCATGAAG |
| AAEL008110 intron 1 forward | GGCAATCAAACCCTTGATTCTGT   |
| AAEL008110 intron 1 reverse | TGGCCGATGTTCGAGTAAACC     |
| AAEL011153 forward          | TCTGCCTTGCCAGTGATTGA      |
| AAEL011153 reverse          | TGCTCGGCTTTGAAGAACC       |
| AAEL012262 forward          | TCGCCACTACTCGTGCTATTC     |
| AAEL012262 reverse          | TCACATTGCTTGATGGCTGT      |
| AAEL018211 intron 1 forward | ATCAAAGCCGCATAGCTTGG      |
| AAEL018211 intron 1 reverse | CGGTCCAGTTCCTAATTGAA      |
| AAEL018211 intron 2 forward | GCTCACCTCGCTTCAGGATT      |
| AAEL018211 intron 2 reverse | TTGTCAAAGACTGGCTAGAGTGA   |
| AAEL018350 forward A        | CCCAAACCAATGAGTAATAAGGA   |
| AAEL018350 forward B        | ACTCAAAGAAATTAGTAATAAGGA  |
| AAEL018350 reverse          | GTAGGTGTCTTAGCAGTGAC      |

### *C. capitata*

|                               |                           |
|-------------------------------|---------------------------|
| LOC101449153 intron 1 forward | GCTTCGCCTGCAGGTAGTC       |
| LOC101449153 intron 1 reverse | CGCCACGTTCCAATAGTTGT      |
| LOC101449153 intron 3 forward | AATTGTGATTGCATTTTGCTCA    |
| LOC101449153 intron 3 reverse | AGAGAATGCGTGAACAACAAGAT   |
| LOC101449503 forward          | TCTTCGACGGTCCAGGACTA      |
| LOC101449503 reverse          | TTTATTCGAGTGGTACGTCAGC    |
| LOC101450641 forward          | TGGTAGGTAGTTAAGTTATTTGACA |
| LOC101450641 reverse          | AGGCTTTTGAAGCTTTTCTCA     |
| LOC101452861 forward          | TTCTGGTGGCATAACAGGTCG     |
| LOC101452861 reverse          | AGCTGTGCAATGAAGTGCGT      |
| LOC101457260 forward          | CCTTTCGGCTGGCTTGGATA      |
| LOC101457260 reverse          | TGAAACCATCGTCTCTATGCT     |
| LOC101459514 intron 1 forward | TCTTCTGGAGAAGCAACTGGG     |
| LOC101459514 intron 1 reverse | TCGCTTTGTTTTCATCCGTCAATTA |
| LOC101459514 intron 2 forward | TGAGCAGCGATTTCTTCTGTT     |
| LOC101459514 intron 2 reverse | TTTAGAGGTAGACCAGTTATTTCAA |

Primers for amplifying other splice forms

*Ae. aegypti*

|                               |                           |
|-------------------------------|---------------------------|
| AAEL000028 forward            | CAGTTGGGAGGCTTCGGTAG      |
| AAEL000028 reverse A          | TGTCATTATTTACAAGGTTTGCTGT |
| AAEL000028 reverse B          | AAAGCCACTGGTTTGCTGTG      |
| AAEL001898 forward            | GCTGTCTATTGTTGGAGTCCTTTT  |
| AAEL001898 reverse            | ACCCAACAGCCATCGATACG      |
| AAEL008110 intron 1 forward   | TTCCGACTTTGCCTGGAACA      |
| AAEL008110 intron 1 reverse A | ATGCAAGTTTCGTCCGTCCT      |
| AAEL008110 intron 1 reverse B | CTCGGATGCTGAGGTCCTG       |
| AAEL011153 forward            | TCTGCCTTGCCAGTGATTGA      |
| AAEL011153 reverse            | CTTGAAAAGAACCCTCACGC      |
| AAEL01226 forward             | TCGCCACTACTCGTGCTATTG     |
| AAEL01226 reverse A           | GCGTTTGCGACCTGTTTGT       |
| AAEL01226 reverse B           | GGGATGCAGGATATCTGAAACTG   |
| AAEL018211 intron 1 forward A | TTTGAGGGCATTTCCTCGCT      |
| AAEL018211 intron 1 reverse A | TCCAAGTCCGCAAGACAAGG      |
| AAEL018211 intron 1 forward B | AGGGCATTTCATTTGGAGCA      |
| AAEL018211 intron 1 reverse B | CGCACGTTGATCCCACAGAT      |
| AAEL018211 intron 2 forward   | GCAGCCTCTACAAATGTGCG      |
| AAEL018211 intron 2 reverse A | CCTGAAGCGAGGAAATGCC       |
| AAEL018211 intron 2 reverse B | GCTCCAAATGAAATGCCCTCA     |
| AAEL018350 forward A          | CCCAAACCAATGAGTAATAAGGA   |
| AAEL018350 forward B          | ACTAGCAGTATAGGTAATAAGGAGA |
| AAEL018350 reverse            | GTAGGTGTCTTAGCAGTGAC      |

*C. capitata*

|                         |                            |
|-------------------------|----------------------------|
| LOC101449153 forward    | TTTGCTCACTCTTCTCGCGT       |
| LOC101449153 reverse    | TGGCAAATATTGAGTACCAACTGA   |
| LOC101449503 forward    | CGTAGGTCTGAATAAATCTCAACATC |
| LOC101449503 reverse    | TGTTTTCGTATTGATTTTCCCTGG   |
| LOC101450641 forward    | ATAACAAGAGCACCCGCATC       |
| LOC101450641 reverse A  | ATTTGGAAAACTTAACTACCTACC   |
| LOC101450641 reverse B  | CGAGGACCCACACGAGAAAG       |
| LOC101452861 forward    | TTCTCTGCTGTGCCTCATCG       |
| LOC101452861 reverse    | TCTGCCATCACATCAGCAGTT      |
| LOC101457260 forward    | GTGTATCTGTAGACGCACGGT      |
| LOC101457260 reverse    | ACCTTTGAAGTGAAAATTTTGGATG  |
| LOC101459514 forward A* | ACTGGTCTACCTCTAAATGAACA    |
| LOC101459514 reverse A* | TGAGCAATAGCCAGTTGTCC       |
| LOC101459514 forward B  | TTGCAGAATAACTGGTCTACCTCT   |
| LOC101459514 reverse B  | TAGGGCAAACACTGCACCG        |

\*Also targets predicted testis-specific splice forms
